# Supplementary material for: Alleviating the competitive adsorption of hydrogen and hydroxyl intermediates on Ru by d–p orbital hybridization for hydrogen electrooxidation
Source: Royal Society of Chemistry journal article supplement (doi:10.1039/d3sc05387c), 2023-12-28
Supplement: d3sc05387c1.pdf [file d3sc05387c1.pdf]

## Supporting Information

### **Alleviating competitive adsorption of hydrogen and hydroxyl intermediates on Ru by *d-p* orbital hybridization for hydrogen electrooxidation**

Youkai Feng<sup>1</sup>, Siguang Lu<sup>1</sup>, Luhong Fu<sup>2</sup>, Fulin Yang<sup>1,\*</sup> and Ligang Feng<sup>1,\*</sup>

<sup>1</sup> School of Chemistry and Chemical Engineering, Yangzhou University, Yangzhou, Jiangsu 225002, China

<sup>2</sup> College of Materials Science and Engineering, Huaqiao University, Xiamen, Fujian 361021, China

Corresponding authors' email addresses: yangfl@yzu.edu.cn;

ligang.feng@yzu.edu.cn

## Experimental procedures

**Chemical and materials.** Ruthenium(III) chloride hydrate ( $\text{RuCl}_3 \cdot n\text{H}_2\text{O}$ , Aladdin Industrial,  $\geq 99\%$ ), nickel(II) acetate tetrahydrate ( $\text{C}_4\text{H}_6\text{NiO}_4 \cdot 4\text{H}_2\text{O}$ , Aladdin Industrial,  $\geq 99\%$ ), ethylene glycol ( $\text{C}_2\text{H}_6\text{O}_2$ , Aladdin Industrial, 98%), selenium (Se, Macklin Industrial,  $\geq 99.999\%$ ), hydrazine hydrate ( $\text{N}_2\text{H}_4 \cdot \text{H}_2\text{O}$ , Sinopharm Chemical Reagent,  $\geq 85\%$ ), ethanol anhydrous ( $\text{C}_2\text{H}_6\text{O}$ , Sinopharm Chemical Reagent,  $\geq 99.7\%$ ), Vulcan XC-72R carbon black (size:50nm), potassium hydroxide (KOH, Aladdin Industrial, 99.99% metals basis, except sodium), isopropyl alcohol ( $\text{C}_3\text{H}_8\text{O}$ , Sinopharm Chemical Reagent,  $\geq 99.5\%$ ), Nafion (Sigma-Aldrich, 5 wt. %). All solutions for synthesis and electrochemical tests were prepared by ultrapure water with a resistance of 18.2 M $\Omega$  (Thermo Fisher Scientific Co. LTD, USA).

**Synthesis of NiSe<sub>2</sub>.** Dissolve 2 mmol nickel(II) acetate tetrahydrate and 8 mmol Se powder in a 150 mL beaker with 30 mL ultrapure water. Then add 30 mL 85%  $\text{N}_2\text{H}_4 \cdot \text{H}_2\text{O}$  under consecutive stirring.<sup>1</sup> After mixing, transfer the mixture to a 100 mL stainless steel polytetrafluoroethylene lined autoclave and heat to 140 °C for 20 h. After cooling to room temperature, the synthesized NiSe<sub>2</sub> product was washed three times with anhydrous ethanol and ultrapure water, centrifuged, and finally dried under vacuum conditions at 60 °C for 10 hours.

**Synthesis of Ru/NiSe<sub>2</sub>/C-20.**  $\text{RuCl}_3$  solution (containing 20 mg Ru), NiSe<sub>2</sub> (20 mg), and ethylene glycol (40 mL) were added into a 250 mL three-necked flask and stirred to obtain a uniformly dispersed solution. The three-necked flask was placed in a microwave apparatus and radially heated under consecutive stirring and the power of 700 W, keeping at the temperature of 150 °C for 20 min.<sup>2</sup> After cooling to room temperature, the three-necked flask was taken out. 30 mg Vulcan XC-72 carbon blacks were added to the solution and kept stirring for another 30 min. The samples were then separated by centrifugation for 4 times, during which the samples were ultrasonically cleaned twice with ultrapure water and absolute ethanol, and once with absolute ethanol. Finally, the as-prepared Ru/NiSe<sub>2</sub>/C-20 sample could be obtained after drying under a vacuum for 10 h at 60 °C. Other samples with different contents

of NiSe<sub>2</sub> could be obtained by varying the feeding ratio of Ni and Ru (0.5, 1.5, 4) at a constant addition of Ru<sup>3+</sup> (20 mg). And the mass of Vulcan XC-72 carbon blacks was tapered off to keep the same total weight of 100 mg (Ru + NiSe<sub>2</sub> + C) The samples were named Ru/NiSe<sub>2</sub>/C-10, Ru/NiSe<sub>2</sub>/C-30, and Ru/NiSe<sub>2</sub>, respectively, corresponding to the feeding ratios of Ni and Ru (0.5, 1.5, 4). Ru/C was synthesized in a similar method without the addition of NiSe<sub>2</sub>.

### **Materials characterization.**

Powder X-ray diffraction (XRD) patterns were recorded on a Bruker D8 Advance powder X-ray diffractometer using a Cu K $\alpha$  ( $\lambda = 1.5405 \text{ \AA}$ ) radiation source operating at 40 kV and 30 mA at a scanning rate of  $5^\circ \text{ min}^{-1}$ . The Zeiss Supra55 field emission scanning electron microscope (SEM) was performed to obtain the SEM images. The high-resolution transmission electron microscopy (HRTEM) was performed on FEI Tecnai G2 F30 STWIN (USA) equipped with the energy-dispersive X-ray spectrum module to visualize the morphologies and element distribution of the samples. High-angle annular dark-field scanning TEM (HAADF-STEM) images were acquired by using JEMARM300F GRAND ARM (JEOL, Japan) with an acceleration voltage of 300kV. Surface analysis of the sample was studied by X-ray photoelectron spectroscopy (XPS, Thermo Science, ESCALAB 250Xi, USA). Inductively coupled plasma atomic emission spectroscopy (ICP-AES) analysis was performed on Optima 7300 DV.

### **Preparation of working electrodes.**

Before the HOR tests, 5.0 mg Ru/C, Ru/NiSe<sub>2</sub>/-10, Ru/NiSe<sub>2</sub>/C-20, Ru/NiSe<sub>2</sub>/C-30, and Ru/NiSe<sub>2</sub> were mixed with 1.0 mL of isopropanol solvent containing 0.05 wt. % Nafion, and then ultrasonicated for 30 min to form the homogeneous inks, respectively. The glassy carbon (GC) electrode with a diameter of 5 mm was polished with a 50 nm gamma alumina powder slurry and ultrasonically cleaned three times with ultrapure water and ethanol in sequence to obtain a smooth and clean surface. After drying naturally in air, 6.0  $\mu\text{L}$  of ink was cast dropwise on the surface and dried

in the air for electrochemical tests. The loadings of Ru on electrocatalysts-decorated electrodes could be calculated from the ICP-AES data, as listed in Table S1.

### **Electrochemical measurements**

Electrochemical tests were conducted at GAMRY Reference 3000 electrochemistry workstation in a standard three-electrode system with the electrocatalyst-decorated GC electrode serving as the working electrode, and the graphite rod (diameter of 1 cm) serving as the counter electrode as well as the Hg/HgO electrode (fully filled with 0.1 M KOH for the tests in pH 13 solutions or 1.0 M KOH for the tests in pH 14 solutions) served as reference electrode. In electrochemical tests, all operations were performed at a constant temperature of  $298 \pm 1$  K. All the measured potentials were referred to the reversible hydrogen electrode (RHE) potential with *iR*-compensated.

Before HOR evaluation, we stabilized the GC disk surface at open circuit potential for more than 300 s in H<sub>2</sub>-saturated 0.1 M or 1.0 M KOH solutions, which was getting closer to the hydrogen equilibrium potential. Then, the HOR polarization curves were drawn at a scan rate of 5 mV s<sup>-1</sup> at an RDE rotation rate of 1600 rpm and a potential range between -0.08 and 0.62 V vs RHE for Ru/C, Ru/NiSe<sub>2</sub>/C-10, Ru/NiSe<sub>2</sub>/C-20, Ru/NiSe<sub>2</sub>/C-30, and Ru/NiSe<sub>2</sub> samples. For the accelerated durability testing (ADT), Ru/NiSe<sub>2</sub>/C-20 was cycled for 1000 CVs at a scan rate of 200 mV s<sup>-1</sup> with potentials ranging from -0.08 to 0.62V vs RHE in an N<sub>2</sub>-saturated electrolyte of 0.1 M KOH. Then the HOR polarization curves were obtained at the H<sub>2</sub>-saturated 0.1 M KOH to evaluate the stability.

In the CO-stripping tests, the electrode potential was maintained at 0.1 V vs RHE for 15 min in 0.1 M KOH solution saturated by 99.99 % CO to allow CO adsorb on the metal surface, followed by N<sub>2</sub> purgation for another 15 min to remove residual CO from the electrolyte. The CO stripping current was obtained through CV at a sweep rate of 20 mV s<sup>-1</sup> in the 0.02 to 0.92 V vs RHE potential range.

In the high-potential oxidation experiment, the GC electrode modified with Ru/NiSe<sub>2</sub>/C-20 was used to obtain Ru/Ni(OH)<sub>2</sub>/C-20 at a scan rate of 50 mV s<sup>-1</sup>

during the potential range of  $-0.08$  to  $1.22$  V vs RHE under  $H_2$ -saturated  $0.1$  M KOH solution. Subsequently, the HOR polarization curve of Ru/Ni(OH)<sub>2</sub>/C-20 was obtained at a potential range of  $-0.08$  to  $0.62$  V vs RHE.

The electrochemical impedance spectroscopy (EIS) test was carried out under the conditions of AC impedance spectrum ranging from  $100$  kHz to  $1$  Hz and voltage disturbance of  $5$  mV. The real part of the resistance at  $1$  kHz is taken as the uncompensated resistance ( $R_u$ ),<sup>3</sup> and the  $iR$ -free potential ( $E_{iR-free}$ ) is obtained according to the following equation (Eq. S1),

$$E_{iR-free} = E - iR_u \quad \text{Eq.S1}$$

The measured current density ( $j$ ), diffusion current density ( $j^d$ ), and kinetic current density ( $j^k$ ) can be related by the Koutecky-Levich equation (Eq. S2, Eq. S3),

$$\frac{1}{j} = \frac{1}{j^k} + \frac{1}{j_d} \quad \text{Eq.S2}$$

$$j_d = 0.62nFD^{2/3}v^{-1/6}c_0\omega^{1/2} = Bc_0\omega^{1/2} \quad \text{Eq.S3}$$

Where  $n$  is the number of electrons involved in the oxidation reaction (2),  $F$  is the Faraday constant ( $96485$  C mol<sup>-1</sup>),  $D$  is the diffusion coefficient of the reactant ( $3.7 \times 10^{-5}$  cm<sup>2</sup> s<sup>-1</sup>),  $v$  is the viscosity of the electrolyte ( $1.01 \times 10^{-2}$  cm<sup>2</sup> s<sup>-1</sup>),  $c_0$  is the solubility of  $H_2$  in the electrolyte ( $7.33 \times 10^{-4}$  mol L<sup>-1</sup>),  $\omega$  is the rotational speed, and  $B$  is the Levich constant.

The exchange current density ( $j^0$ ) and the kinetic current density  $j^k$  are related by the Butler-Volmer equation (Eq. S4),

$$j^k = j^0 \left[ e^{\frac{\alpha F}{RT}\eta} - e^{-\frac{(1-\alpha)F}{RT}\eta} \right] \quad \text{Eq.S4}$$

$j^0$  could be also obtained from the approximate Butler-Volmer equation (Eq. S5),

$$j = j^0 \frac{\eta F}{RT} \quad \text{Eq.S5}$$

Where,  $\alpha$ ,  $\eta$ ,  $R$ , and  $T$  represent the transfer coefficient, overpotential, universal gas constant ( $8.314 \text{ J mol}^{-1} \text{ K}^{-1}$ ), and Kelvin temperature, respectively.

## DFT calculations

DFT calculations were performed using the CASTEP module in the Materials Studio program at Bio Accelrys. The generalized gradient approximation method (GGA) with the Perdew-Burke-Ernzerh (PBE) functional was used to describe the exchange and correlation interactions.<sup>4, 5</sup> The interactions between valence electrons and ionic cores were described by Ultrasoft pseudo-potential. A two-layer  $\sqrt{3} \times \sqrt{3}$  supercell of cubic NiSe<sub>2</sub>(111) slabs, a one-layer  $6 \times 6$  supercell of graphene(001), and a one-layer  $4 \times 4$  supercell of Ni(OH)<sub>2</sub> were constructed to simulate the NiSe<sub>2</sub>, carbon, and Ni(OH)<sub>2</sub> supports, respectively. In Ni(OH)<sub>2</sub>, three H atoms were deleted for anchoring the Ru cluster. A Ru cluster with 13 atoms was chosen to mimic the supported Ru nanocrystals, which could reflect the *hcp* phase, consistent with the experimental results. For each model, the vacuum gap was set as 15 Å. And the atoms on the bottom layer were fixed, and the other atoms were fully optimized. The electronic wave functions were expanded on a plane wave basis with a cut-off energy of 350 eV. And  $2 \times 2 \times 1$  Monkhorst-Pack grid k-points were employed for the geometric optimizations. The convergence threshold is set as  $1.0^{-6}$  eV in energy and 0.03 eV/Å in force, respectively. The adsorption free energies of each intermediate including H<sub>ad</sub>, OH<sub>ad</sub>, H<sub>ad</sub>+OH<sub>ad</sub>, and H<sub>2</sub>O<sub>ad</sub> were determined by the following formula  $\Delta G = \Delta E + \Delta \text{ZPE} - T\Delta S$ , where  $\Delta E$ ,  $\Delta \text{ZPE}$ , and  $\Delta S$  represent the binding energy, zero-point energy change and entropy change of the adsorption process, respectively.<sup>6, 7</sup> Different sites have been considered.

## Results and Discussion

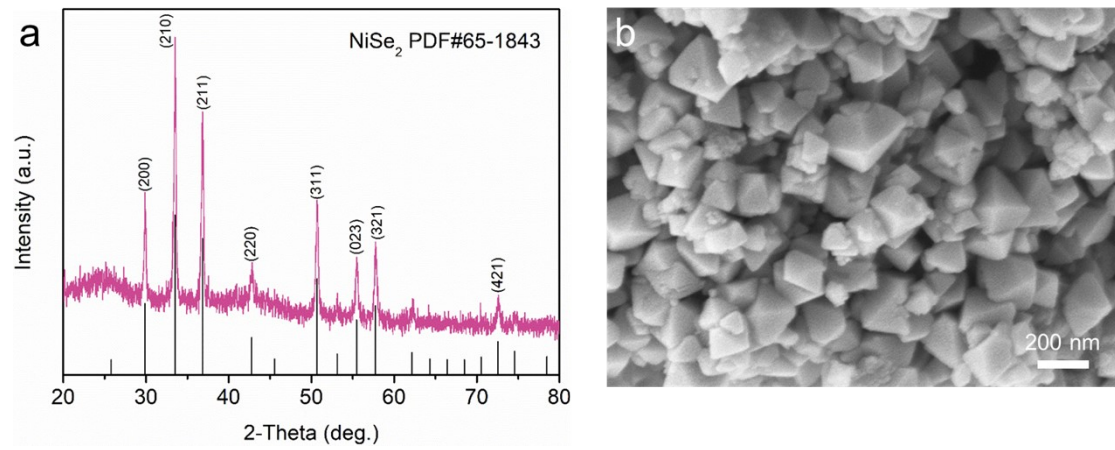

**Figure S1.** (a) XRD pattern and (b) SEM image of NiSe<sub>2</sub>.

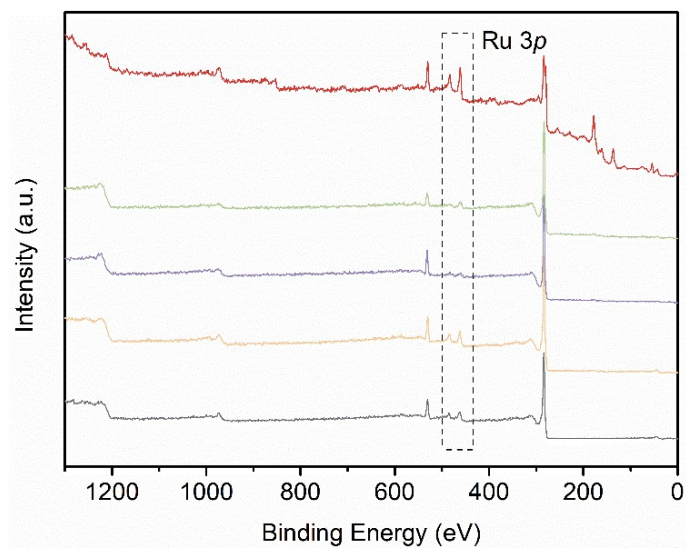

**Figure S2.** The XPS survey spectra of Ru/C, Ru/NiSe<sub>2</sub>/C-10, Ru/NiSe<sub>2</sub>/C-20, Ru/NiSe<sub>2</sub>/C-30, and Ru/NiSe<sub>2</sub>.



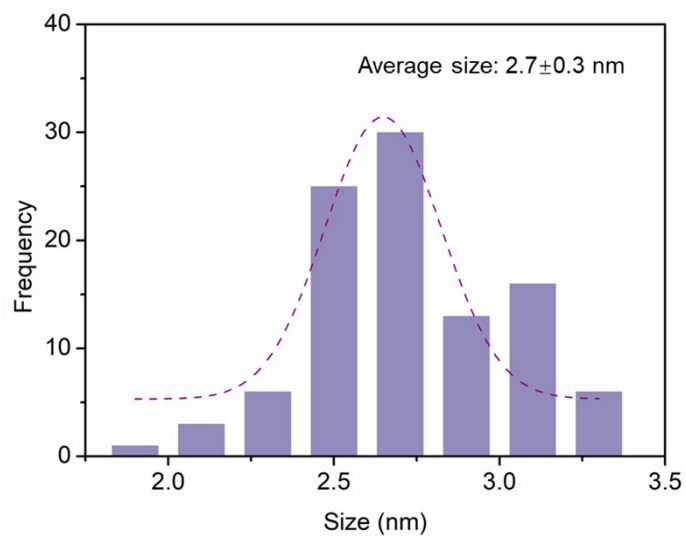

**Figure S3.** Size distribution histograms of Ru/NiSe<sub>2</sub>/C-20.

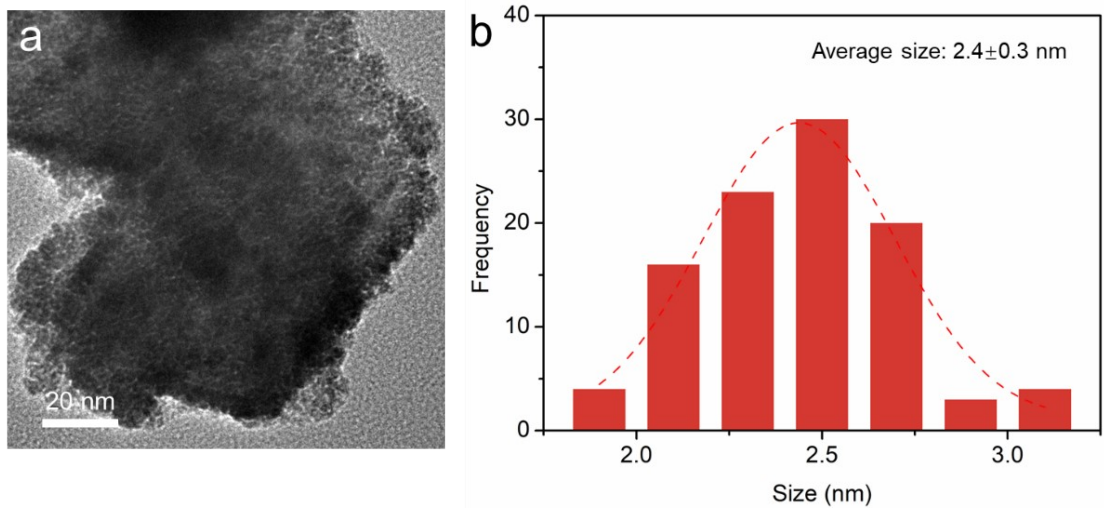

**Figure S4.** (a) HRTEM image and (b) size distribution histograms of Ru/NiSe<sub>2</sub>.

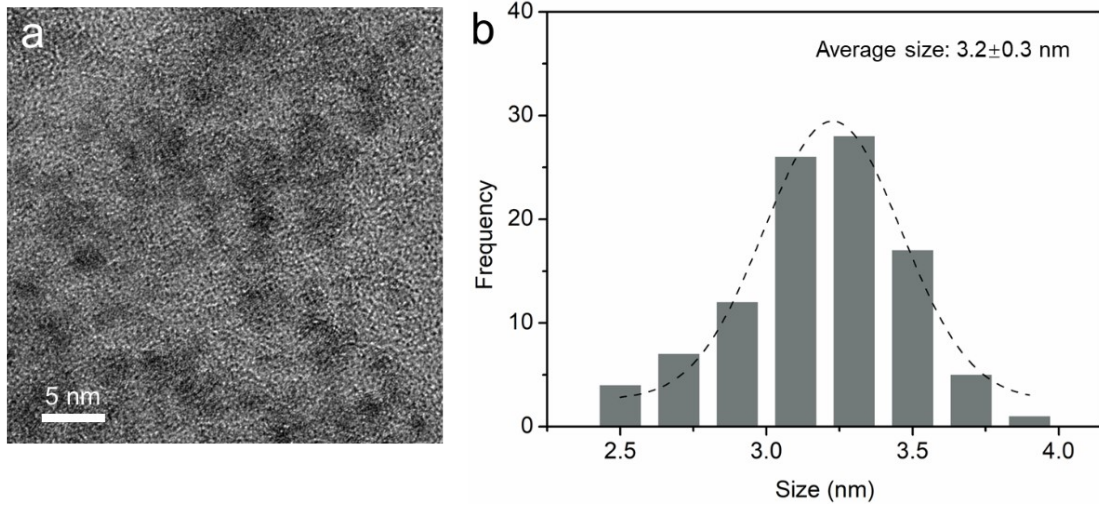

**Figure S5.** (a) HRTEM image and (b) size distribution histograms of Ru/C.

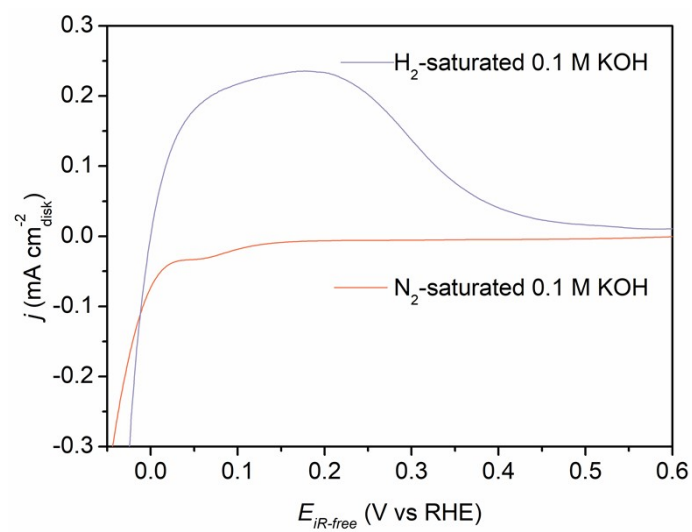

**Figure S6.** Polarization curves of Ru/NiSe<sub>2</sub>/C-20 in H<sub>2</sub> or N<sub>2</sub>-saturated 0.1 M KOH electrolytes.

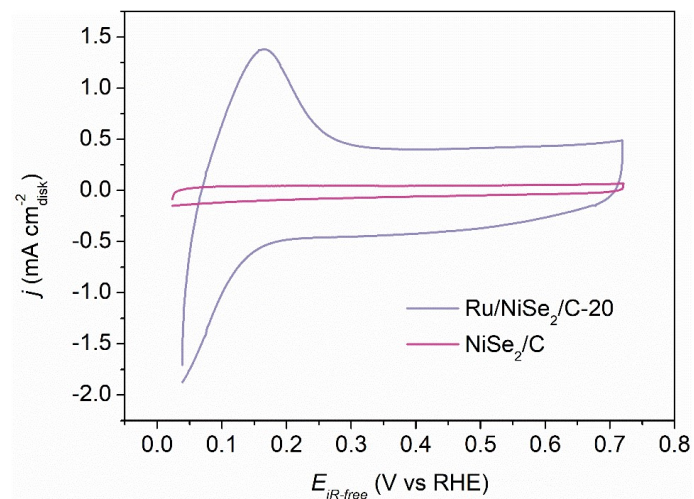

**Figure S7.** CVs in  $N_2$ -saturated 0.1 M KOH at a scan rate of  $50 \text{ mVs}^{-1}$  for Ru/NiSe<sub>2</sub>/C-20 and NiSe<sub>2</sub>/C.

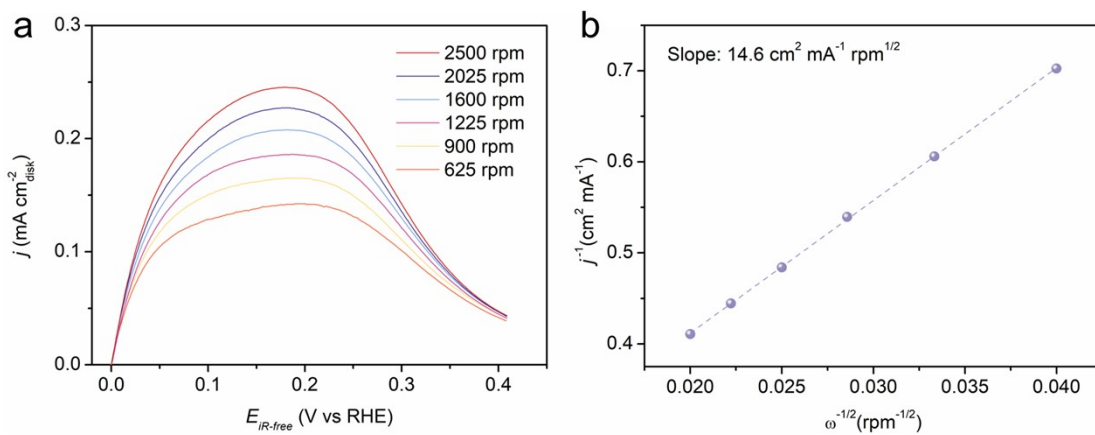

**Figure S8.** (a) HOR polarization curves in H<sub>2</sub>-saturated 0.1 M KOH with the scanning rate of 5 mV s<sup>-1</sup> at the rotating rates ranging from 2500 to 625 rpm of Ru/NiSe<sub>2</sub>/C-20 and (b) corresponding Koutecky-Levich plot.

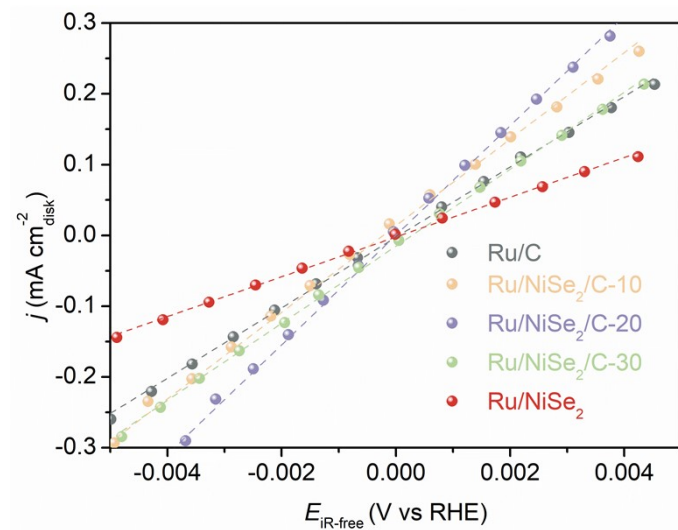

**Figure S9.** Linear fitting curves in the micro-polarization region.

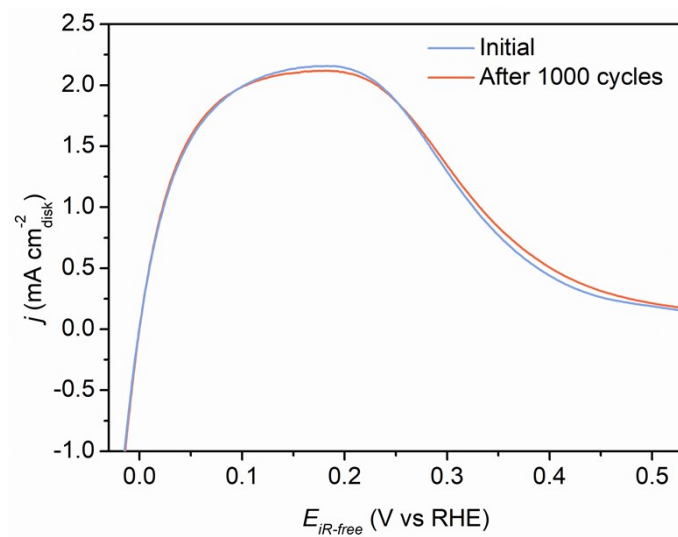

**Figure S10.** HOR polarization curves of Ru/NiSe<sub>2</sub>/C-20 recorded before and after 1000 cycles in 0.1 M KOH (ADT).



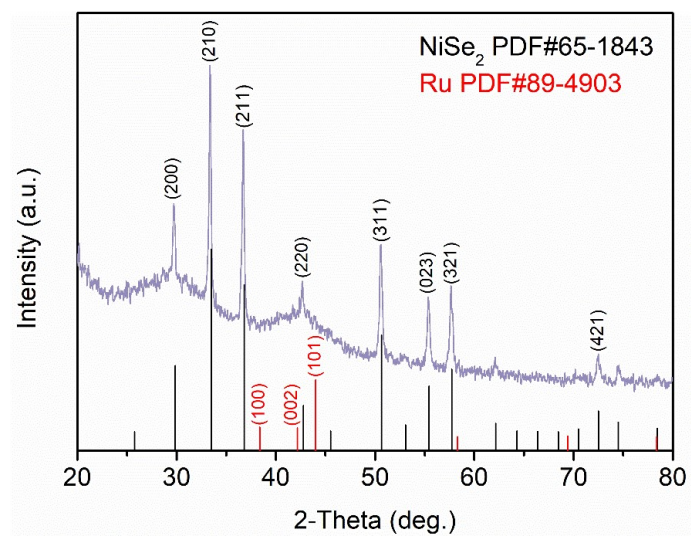

**Figure S11.** XRD pattern Ru/NiSe<sub>2</sub>/C-20 after ADT.

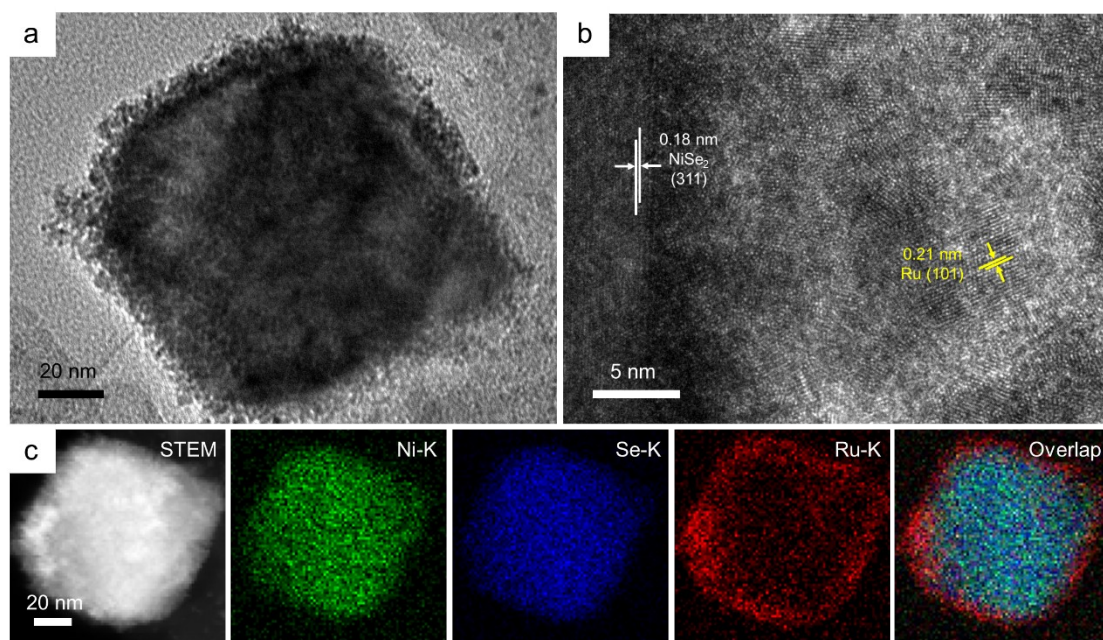

**Figure S12.** (a) TEM image, (b) HRTEM image, and (c) corresponding EDS mapping images of Ru/NiSe<sub>2</sub>/C-20 after ADT.

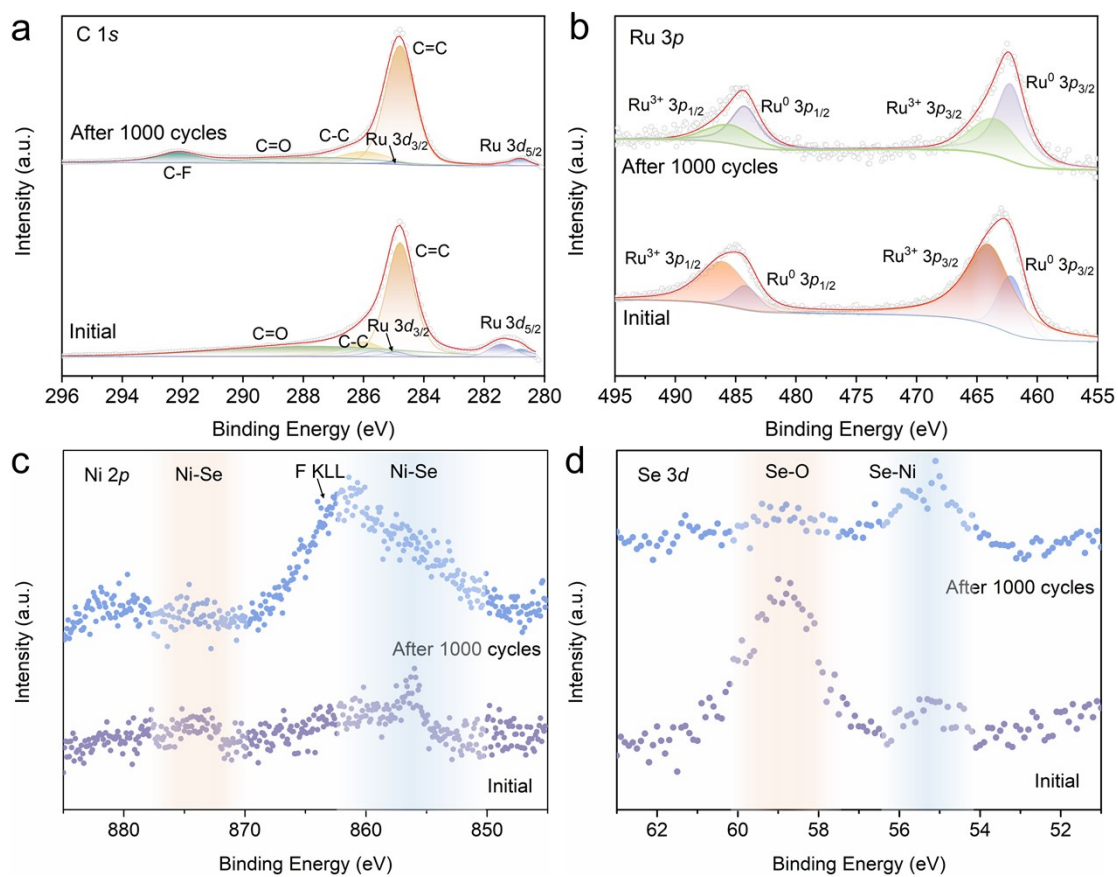

**Figure S13.** High-resolution XPS spectra of (a) C 1s, (b) Ru 3p, (c) Ni 2p, and (d) Se 3d for Ru/NiSe<sub>2</sub>/C-20 before and after 1000 CV cycles.

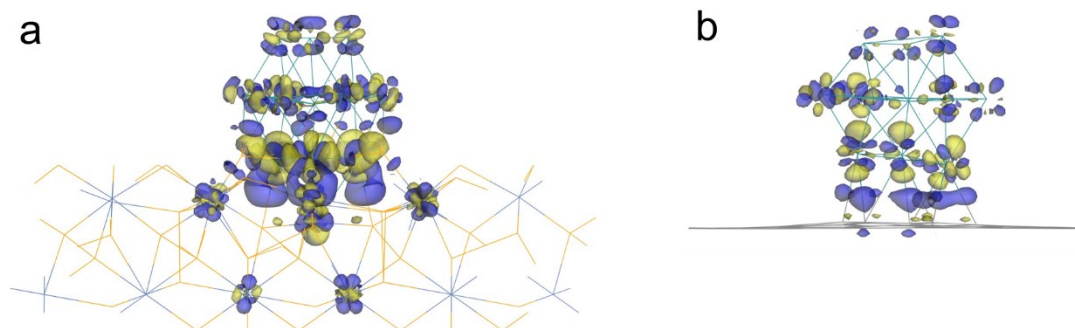

**Figure S14.** Charge density difference plots of (a) Ru/NiSe<sub>2</sub> and (b) Ru/C with the isosurface value of 0.05 eÅ<sup>-3</sup>. The yellow and blue outlines show electron accumulation and depletion, respectively.

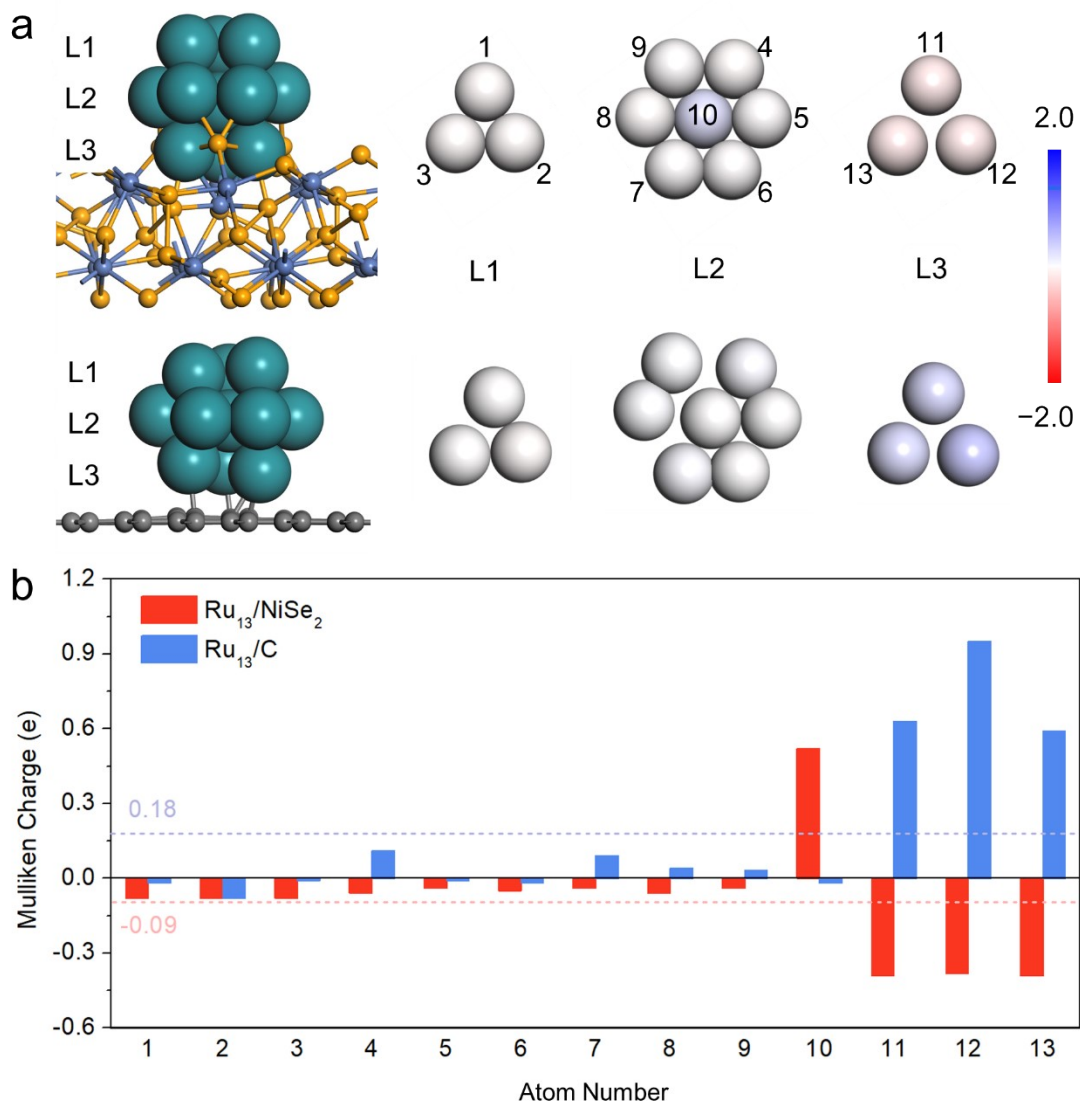

**Figure S15.** (a) Mulliken charge distribution plot of each atom on NiSe<sub>2</sub>(111) or C(001) supported Ru<sub>13</sub> clusters and (b) the corresponding charge values statics. The dash lines indicate the average values of Ru/NiSe<sub>2</sub> and Ru/C.

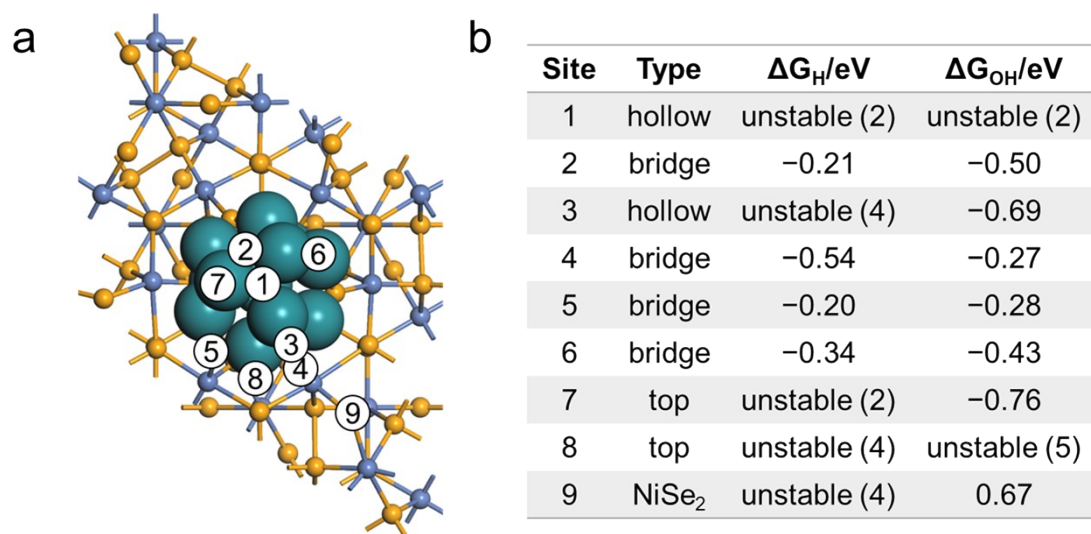

**Figure S16.** (a) Different adsorption sites for  $H_{ad}$  and  $OH_{ad}$  on the Ru/NiSe<sub>2</sub> model. (b) Corresponding free energy values. (The numbers in parentheses represent the final stable sites).

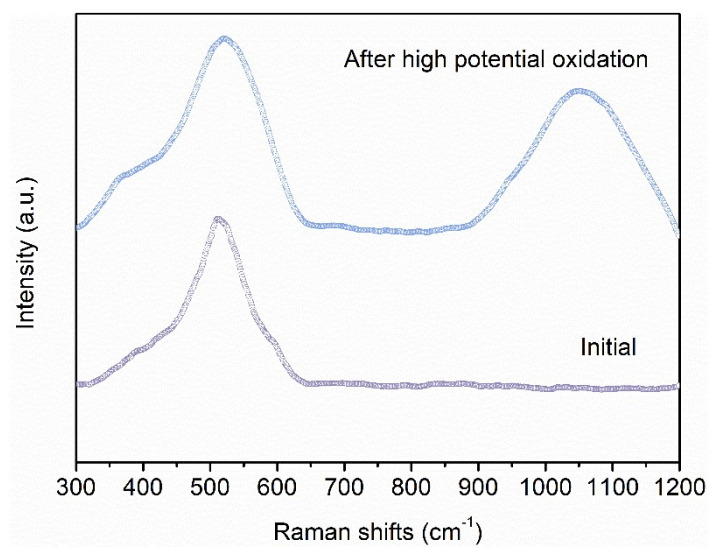

**Figure S17.** Raman spectra of NiSe<sub>2</sub> before and after high-potential oxidation.

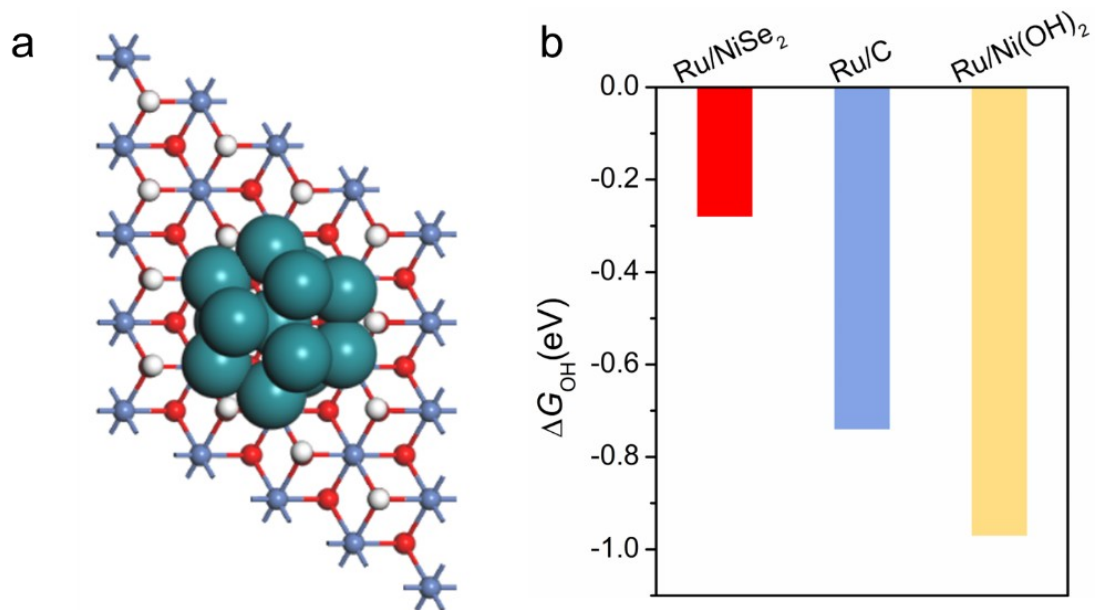

**Figure S18.** (a) Model of Ru/Ni(OH)<sub>2</sub> and (b) the comparison of the  $\Delta G_{\text{OH}}$  values between Ru/NiSe<sub>2</sub>, Ru/C, and Ru/Ni(OH)<sub>2</sub>.



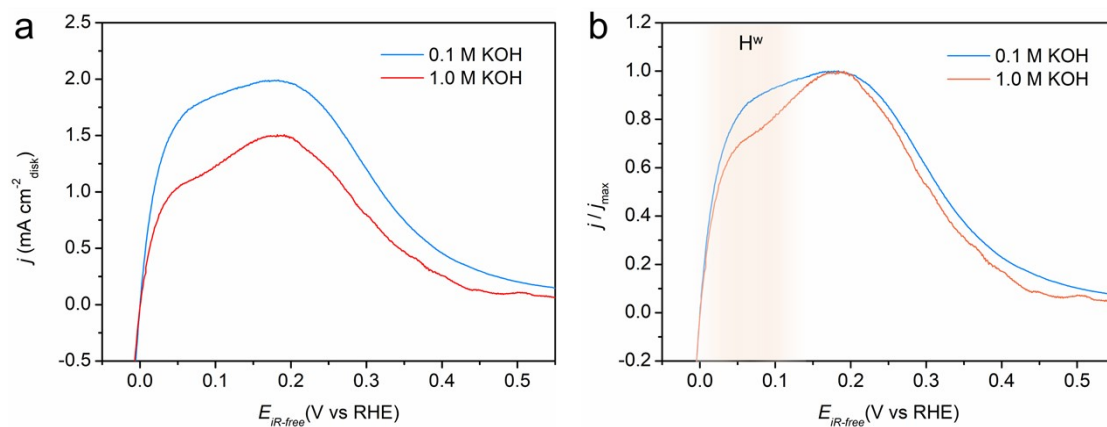

**Figure S19.** (a) HOR polarization curves and (b) Normalized HOR polarizations of Ru/NiSe<sub>2</sub>/C-20 in 0.1 M and 1.0 M KOH solutions.

**Table S1.** Ru, Ni, and Se atomic percentages for four samples of Ru/NiSe<sub>2</sub>/C-X (X = 10, 20, 30) and Ru/NiSe<sub>2</sub>.

| Sample                     | Atomic percentage (%) |       |       | Ru/Ni atomic ratio |
|----------------------------|-----------------------|-------|-------|--------------------|
|                            | Ru                    | Ni    | Se    |                    |
| Ru/NiSe <sub>2</sub> /C-10 | 52.63                 | 19.30 | 28.07 | 2.73               |
| Ru/NiSe <sub>2</sub> /C-20 | 41.82                 | 22.09 | 36.09 | 1.89               |
| Ru/NiSe <sub>2</sub> /C-30 | 32.71                 | 25.13 | 42.15 | 1.30               |
| Ru/NiSe <sub>2</sub>       | 14.67                 | 31.37 | 53.96 | 0.47               |

**Table S2.** The data of HOR activities in this work obtained by Butler-Volmer fitting and linear fitting.

| Sample                          | Butler-Volmer fitting                                       |                                       |                                               |                                               | Linear fitting                        |                                               |
|---------------------------------|-------------------------------------------------------------|---------------------------------------|-----------------------------------------------|-----------------------------------------------|---------------------------------------|-----------------------------------------------|
|                                 | Loading                                                     | $j^{0,s}$                             | $j^{0,m}$                                     | $j^{k,m}@50mV$                                | $j^{0,s}$                             | $j^{0,m}$                                     |
|                                 | ( $\mu\text{g}_{\text{Ru}} \text{ cm}_{\text{disk}}^{-2}$ ) | ( $\text{mA cm}_{\text{ECSA}}^{-2}$ ) | ( $\text{mA } \mu\text{g}_{\text{Ru}}^{-1}$ ) | ( $\text{mA } \mu\text{g}_{\text{Ru}}^{-1}$ ) | ( $\text{mA cm}_{\text{ECSA}}^{-2}$ ) | ( $\text{mA } \mu\text{g}_{\text{Ru}}^{-1}$ ) |
| <b>Ru/C</b>                     | 3.60                                                        | 0.030                                 | 0.442                                         | 0.967                                         | 0.025                                 | 0.365                                         |
| <b>Ru/NiSe<sub>2</sub>/C-10</b> | 3.48                                                        | 0.067                                 | 0.663                                         | 1.896                                         | 0.053                                 | 0.525                                         |
| <b>Ru/NiSe<sub>2</sub>/C-20</b> | 2.43                                                        | 0.111                                 | 0.882                                         | 2.510                                         | 0.084                                 | 0.670                                         |
| <b>Ru/NiSe<sub>2</sub>/C-30</b> | 2.86                                                        | 0.115                                 | 0.555                                         | 1.796                                         | 0.085                                 | 0.411                                         |
| <b>Ru/NiSe<sub>2</sub></b>      | 8.84                                                        | 0.560                                 | 0.107                                         | 0.321                                         | 0.372                                 | 0.063                                         |

**Table S3.** Comparison of the HOR activity in 0.1 M KOH referring to Ru-based catalysts.

| Catalyst                              | Loading<br>( $\mu\text{g}_{\text{Ru}} \text{cm}_{\text{disk}}^{-2}$ ) | $j^{0,s}$<br>( $\text{mA cm}_{\text{ECSA}}^{-2}$ ) | $j^{0,m}$<br>( $\text{mA } \mu\text{g}_{\text{Ru}}^{-1}$ ) | $j^{k,m}@50\text{mV}$<br>( $\text{mA } \mu\text{g}_{\text{Ru}}^{-1}$ ) | Reference |
|---------------------------------------|-----------------------------------------------------------------------|----------------------------------------------------|------------------------------------------------------------|------------------------------------------------------------------------|-----------|
| <b>Ru/NiSe<sub>2</sub>/C-20</b>       | 2.43                                                                  | 0.111                                              | 0.882                                                      | 2.510                                                                  |           |
| <b>Ru/NiSe<sub>2</sub></b>            | 8.84                                                                  | 0.560                                              | 0.107                                                      | 0.321                                                                  | This work |
| <b>Ru/C</b>                           | 3.60                                                                  | 0.030                                              | 0.442                                                      | 0.967                                                                  |           |
| <b>Ru-SO<sub>4</sub></b>              | 4.78                                                                  | 0.548                                              | 0.462                                                      | 1.182                                                                  |           |
| <b>Ru/C</b>                           | 4.65                                                                  |                                                    | 0.231                                                      |                                                                        | 8         |
| <b>Ru-Ru<sub>2</sub>P/C</b>           | 8.33                                                                  |                                                    | 0.375                                                      | 1.265                                                                  |           |
| <b>Ru<sub>2</sub>P/C</b>              | 9.26                                                                  |                                                    | 0.252                                                      | 0.558                                                                  | 9         |
| <b>Ru/C</b>                           | 9.54                                                                  |                                                    | 0.157                                                      | 0.228                                                                  |           |
| <b>Ru<sub>7</sub>Ni<sub>3</sub>/C</b> | 3.87                                                                  |                                                    |                                                            |                                                                        |           |
| <b>Ru/C</b>                           | 3.87                                                                  |                                                    |                                                            |                                                                        | 10        |
| <b>Mo-Ru-NSAs</b>                     |                                                                       |                                                    |                                                            | 2.45                                                                   | 11        |
| <b>Sn-Ru/C</b>                        | 6.26                                                                  | 0.47                                               |                                                            | 1.79                                                                   |           |
| <b>Ga-Ru/C</b>                        | 7.04                                                                  | 0.3                                                |                                                            | 0.593                                                                  | 12        |
| <b>Ru/C</b>                           | 7.8                                                                   | 0.24                                               |                                                            | 0.274                                                                  |           |
| <b>Ru@C-280</b>                       |                                                                       | 0.49                                               |                                                            | 9.53                                                                   |           |
| <b>Ru@C-340</b>                       |                                                                       | 0.39                                               |                                                            | 1.2                                                                    |           |
| <b>Ru@C-400</b>                       |                                                                       | 0.31                                               |                                                            | 0.64                                                                   | 13        |
| <b>Ru/C</b>                           |                                                                       | 0.23                                               |                                                            | 0.19                                                                   |           |
| <b>Mo-Ru-1/C</b>                      | 5.97                                                                  | 0.3                                                |                                                            | 1.73                                                                   |           |
| <b>Mo-Ru-2/C</b>                      | 5.92                                                                  | 0.35                                               |                                                            | 1.86                                                                   |           |
| <b>Mo-Ru-3/C</b>                      | 5.6                                                                   | 0.23                                               |                                                            | 1.25                                                                   | 14        |
| <b>Ru/C</b>                           | 6.5                                                                   | 0.14                                               |                                                            | 0.24                                                                   |           |
| <b>P-Ru-1/C</b>                       | 1.22                                                                  | 0.25                                               | 0.12                                                       |                                                                        | 15        |

|                                |      |      |       |      |
|--------------------------------|------|------|-------|------|
| <b>P-Ru-2/C</b>                | 1.12 | 0.35 | 0.19  |      |
| <b>P-Ru-3/C</b>                | 6.06 | 0.72 | 0.43  |      |
| <b>P-Ru-4/C</b>                | 1.28 | 0.66 | 0.36  |      |
| <b>P-Ru-5/C</b>                | 1.21 | 0.63 | 0.26  |      |
| <b>Ru/C</b>                    |      | 0.15 | 0.13  |      |
| <b>Ru/C</b>                    |      |      | 0.052 |      |
| <b>IO-Ru-TiO<sub>2</sub>/C</b> |      |      | 0.907 | 16   |
| <b>MoO<sub>x</sub>-Ru fcc</b>  |      |      | 1.66  | 5.72 |
| <b>MoO<sub>x</sub>-Ru hcp</b>  |      |      | 0.61  | 1.16 |
| <b>Ru/C</b>                    |      |      | 0.089 | 0.13 |
| <b>Ru/C</b>                    | 10   |      | 0.23  |      |
| <b>RuNi/C</b>                  | 10   |      | 2.34  | 18   |

**Table S4.** XPS peak data about the C 1s spectra of Ru/NiSe<sub>2</sub>/C-20 before and after ADT.

| Catalysts                            | Peak | Binding energy (eV) | Content |
|--------------------------------------|------|---------------------|---------|
| Ru/NiSe <sub>2</sub> /C-20           | C=C  | 284.8               | 49.75%  |
|                                      | C=O  | 287.6               | 11.15 % |
|                                      | C–C  | 287.6               | 26.66 % |
| Ru/NiSe <sub>2</sub> /C-20 after ADT | C=C  | 284.8               | 63.02 % |
|                                      | C=O  | 287.6               | 9.52 %  |
|                                      | C–C  | 286.0               | 12.48 % |
|                                      | C–F  | 292.1               | 11.21 % |

**Table S5.** XPS peak data about the Ru 3*p* spectra of Ru/NiSe<sub>2</sub>/C-20 before and after ADT.

| Catalysts                               | Ru 3 <i>p</i> <sub>3/2</sub> |                     | Ru 3 <i>p</i> <sub>1/2</sub> |                     | Content | Ru <sup>0</sup> /<br>Ru <sup>3+</sup> |
|-----------------------------------------|------------------------------|---------------------|------------------------------|---------------------|---------|---------------------------------------|
|                                         | Peak                         | Binding energy (eV) | Peak                         | Binding energy (eV) |         |                                       |
| Ru/NiSe <sub>2</sub> /C-20              | Ru <sup>0</sup>              | 462.1               | Ru <sup>0</sup>              | 484.1               | 22.81 % | 0.30                                  |
|                                         | Ru <sup>3+</sup>             | 464.3               | Ru <sup>3+</sup>             | 486.3               | 77.19 % |                                       |
| Ru/NiSe <sub>2</sub> /C-20<br>after ADT | Ru <sup>0</sup>              | 462.1               | Ru <sup>0</sup>              | 484.1               | 67.38 % | 2.35                                  |
|                                         | Ru <sup>3+</sup>             | 464.3               | Ru <sup>3+</sup>             | 486.3               | 28.62 % |                                       |

**Table S6.** XPS peak data about the Ni 2*p* spectra of Ru/NiSe<sub>2</sub>/C-20 before and after ADT.

| Catalysts                            | Ni 2 <i>p</i> |                     |       |                     |
|--------------------------------------|---------------|---------------------|-------|---------------------|
|                                      | Peak          | Binding energy (eV) | Peak  | Binding energy (eV) |
| Ru/NiSe <sub>2</sub> /C-20           | Ni–Se         | 856.2               | Ni–Se | 873.3               |
| Ru/NiSe <sub>2</sub> /C-20 after ADT | Ni–Se         | 856.1               | Ni–Se | 873.2               |



**Table S7.** XPS peak data about the Se 3*d* spectra of Ru/NiSe<sub>2</sub>/C-20 before and after ADT.

| Catalysts                            | Se 3 <i>d</i> |                     |      |                     |
|--------------------------------------|---------------|---------------------|------|---------------------|
|                                      | Peak          | Binding energy (eV) | Peak | Binding energy (eV) |
| Ru/NiSe <sub>2</sub> /C-20           | Se-Ni         | 55.1                | Se-O | 58.8                |
| Ru/NiSe <sub>2</sub> /C-20 after ADT | Se-Ni         | 55.0                |      |                     |

**Table S8.** Mulliken charge ( $e^-$ ) of each Ru atoms in Ru/NiSe<sub>2</sub> and Ru/C, corresponding to Figure S12.

| <b>Atom No.</b> | <b>Ru/NiSe<sub>2</sub></b> | <b>Ru/C</b> |
|-----------------|----------------------------|-------------|
| <b>1</b>        | -0.08                      | -0.02       |
| <b>2</b>        | -0.08                      | -0.08       |
| <b>3</b>        | -0.08                      | -0.01       |
| <b>4</b>        | -0.06                      | 0.11        |
| <b>5</b>        | -0.04                      | -0.01       |
| <b>6</b>        | -0.05                      | -0.02       |
| <b>7</b>        | -0.04                      | 0.09        |
| <b>8</b>        | -0.06                      | 0.04        |
| <b>9</b>        | -0.04                      | 0.03        |
| <b>10</b>       | 0.52                       | -0.02       |
| <b>11</b>       | -0.39                      | 0.63        |
| <b>12</b>       | -0.38                      | 0.95        |
| <b>13</b>       | -0.39                      | 0.59        |

## References

- (1) Zhu, S.; Li, Q.; Wei, Q.; Sun, R.; Liu, X.; An, Q.; Mai, L., NiSe<sub>2</sub> Nanooctahedra as an Anode Material for High-Rate and Long-Life Sodium-Ion Battery. *ACS Appl. Mater. Interfaces* **2017**, *9*, 311-316.
- (2) Harpeness, R.; Peng, Z.; Liu, X.; Pol, V. G.; Kolytyn, Y.; Gedanken, A., Controlling the agglomeration of anisotropic Ru nanoparticles by the microwave-polyol process. *J. Colloid Interf. Sci.* **2005**, *287*, 678-684.
- (3) Sheng, W.; Gasteiger, H. A.; Shao-Horn, Y., Hydrogen Oxidation and Evolution Reaction Kinetics on Platinum: Acid vs Alkaline Electrolytes. *J. Electrochem. Soc.* **2010**, *157*, B1529.
- (4) Vanderbilt, D., Soft self-consistent pseudopotentials in a generalized eigenvalue formalism. *Phys. Rev. B* **1990**, *41*, 7892-7895.
- (5) Perdew, J. P.; Burke, K.; Ernzerhof, M., Generalized Gradient Approximation Made Simple. *Phys. Rev. Lett.* **1996**, *77*, 3865-3868.
- (6) Ferrin, P.; Nilekar, A. U.; Greeley, J.; Mavrikakis, M.; Rossmeisl, J., Reactivity descriptors for direct methanol fuel cell anode catalysts. *Surf Sci* **2008**, *602*, 3424-3431.
- (7) Nørskov, J. K.; Bligaard, T.; Logadottir, A.; Kitchin, J. R.; Chen, J. G.; Pandelov, S.; Stimming, U., Trends in the Exchange Current for Hydrogen Evolution. *J. Electrochem. Soc.* **2005**, *152*, J23.
- (8) Yang, C.; Li, Y.; Yue, J.; Cong, H.; Luo, W., Promoting water formation in sulphate-functionalized Ru for efficient hydrogen oxidation reaction under alkaline electrolytes. *Chem. Sci.* **2023**, *14*, 6289-6294.
- (9) Su, L.; Jin, Y.; Gong, D.; Ge, X.; Zhang, W.; Fan, X.; Luo, W., The Role of Discrepant Reactive Intermediates on Ru-Ru<sub>2</sub>P Heterostructure for pH-Universal

Hydrogen Oxidation Reaction. *Angew. Chem. Int. Edit.* **2023**, *62*, e202215585.

(10) Xue, Y.; Shi, L.; Liu, X.; Fang, J.; Wang, X.; Setzler, B. P.; Zhu, W.; Yan, Y.; Zhuang, Z., A highly-active, stable and low-cost platinum-free anode catalyst based on RuNi for hydroxide exchange membrane fuel cells. *Nat. Commun.* **2020**, *11*, 5651.

(11) Li, L.; Liu, S.; Zhan, C.; Wen, Y.; Sun, Z.; Han, J.; Chan, T.-S.; Zhang, Q.; Hu, Z.; Huang, X., Surface and lattice engineered ruthenium superstructures towards high-performance bifunctional hydrogen catalysis. *Energy Environ. Sci.* **2023**, *16*, 157-166.

(12) Wu, L.; Su, L.; Liang, Q.; Zhang, W.; Men, Y.; Luo, W., Boosting Hydrogen Oxidation Kinetics by Promoting Interfacial Water Adsorption on d-p Hybridized Ru Catalysts. *ACS Catal.* **2023**, *13*, 4127-4133.

(13) Yang, Z.; Lai, W.; He, B.; Wang, J.; Yu, F.; Liu, Q.; Liu, M.; Zhang, S.; Ding, W.; Lin, Z.; Huang, H., Tailoring Interfacial Chemistry of Defective Carbon-Supported Ru Catalyst Toward Efficient and CO-Tolerant Alkaline Hydrogen Oxidation Reaction. *Adv. Energy Mater.* **2023**, *13*, 2300881.

(14) Zhao, Y.; Wu, D.; Luo, W., Correlating Alkaline Hydrogen Electrocatalysis and Hydroxide Binding Energies on Mo-Modified Ru Catalysts. *ACS Sustain. Chem. Eng.* **2022**, *10*, 1616-1623.

(15) Zhao, Y.; Wang, X.; Cheng, G.; Luo, W., Phosphorus-Induced Activation of Ruthenium for Boosting Hydrogen Oxidation and Evolution Electrocatalysis. *ACS Catal.* **2020**, *10*, 11751-11757.

(16) Jiang, J.; Tao, S.; He, Q.; Wang, J.; Zhou, Y.; Xie, Z.; Ding, W.; Wei, Z., Interphase-oxidized ruthenium metal with half-filled d-orbitals for hydrogen oxidation in an alkaline solution. *J. Mater. Chem. A* **2020**, *8*, 10168-10174.

(17) Li, L.; Liu, C.; Liu, S.; Wang, J.; Han, J.; Chan, T.-S.; Li, Y.; Hu, Z.; Shao, Q.; Zhang, Q.; Huang, X., Phase Engineering of a Ruthenium Nanostructure toward High-Performance Bifunctional Hydrogen Catalysis. *ACS Nano* **2022**, *16*, 14885-14894.

(18) Jiang, T.; Liu, Z.; Yuan, Y.; Zheng, X.; Park, S.; Wei, S.; Li, L.; Ma, Y.; Liu, S.; Chen, J.; Zhu, Z.; Meng, Y.; Li, K.; Sun, J.; Peng, Q.; Chen, W., Ultrafast Electrical Pulse Synthesis of Highly Active Electrocatalysts for Beyond-Industrial-Level Hydrogen Gas Batteries. *Adv. Mater.* **2023**, *35*, 2300502.
